# Supplementary material
Source: HighWire-hosted journal article supplement (https://bmjopen.bmj.com/content/10/8/e036910)
Supplement: inline-supplementary-material-2 [file inline-supplementary-material-2.pdf]

**Supplementary Table** Association of each item of the workplace social capital (WSC) scale with refraining from seeking medical care during the one-year follow-up period among Japanese employees: Cox regression with robust variance using a constant in the time variable †

|                           | Men (n=6881)                            |                     | Women (n=1889)                          |                     |
|---------------------------|-----------------------------------------|---------------------|-----------------------------------------|---------------------|
|                           | Relative risk (95% confidence interval) |                     | Relative risk (95% confidence interval) |                     |
|                           | Model 1 ‡                               | Model 2 §           | Model 1 ‡                               | Model 2 §           |
| Item #1 (network-1)       | 1.05 (1.00 to 1.09)                     | 1.04 (1.00 to 1.08) | 1.14 (1.06 to 1.22)                     | 1.14 (1.07 to 1.22) |
| Item #2 (network-2)       | 1.09 (1.05 to 1.14)                     | 1.09 (1.04 to 1.13) | 1.10 (1.03 to 1.18)                     | 1.12 (1.04 to 1.19) |
| Item #3 (network-3)       | 1.11 (1.07 to 1.16)                     | 1.10 (1.06 to 1.15) | 1.12 (1.04 to 1.20)                     | 1.12 (1.05 to 1.20) |
| Item #4 (reciprocity)     | 1.07 (1.03 to 1.11)                     | 1.06 (1.02 to 1.11) | 1.11 (1.04 to 1.18)                     | 1.12 (1.05 to 1.19) |
| Item #5 (trust)           | 1.07 (1.03 to 1.12)                     | 1.07 (1.03 to 1.11) | 1.10 (1.03 to 1.18)                     | 1.12 (1.05 to 1.19) |
| Item #6 (laughter/smiles) | 1.04 (1.00 to 1.08)                     | 1.05 (1.01 to 1.09) | 1.05 (0.98 to 1.12)                     | 1.07 (1.01 to 1.15) |

† Each item score was reverse-coded so that higher score indicated lower WSC.

‡ Crude (ie, without any adjustment).

§ Adjusted for age, educational attainment and equivalent annual household income.
